# Supplementary material
Source: PubMed Central journal article supplement (PMC7546417)
Supplement: NIHMS1633366-supplement-1.pdf [file NIHMS1633366-supplement-1.pdf]

**Supplementary Table S1. Sequences of primers for genotyping *Pcsk9* knockout mice**

| <b>Primer Type</b> | <b>Sequence 5'--&gt;3'</b> | <b>Product Size</b> | <b>GenBank Accession</b> |
|--------------------|----------------------------|---------------------|--------------------------|
| Common-F           | ATTGTTGGAGGGAGAAGTACAGGGGT |                     |                          |
| Wild-type-R        | CTCGGGAAGGACATGGACGC       | 496bp               | NM_153565                |
| Mutant-R           | GATTGGGAAGACAATAGCAGGCATGC | 320bp               |                          |

**Supplementary Table S2. Sequences of siRNA targeting to *Pcsk9***

---

|            |            |                           |
|------------|------------|---------------------------|
| si-Pcsk9-A | Sense:     | GccuGGAGuuuAuucGGAAAdT*dT |
|            | Antisense: | UUCCgAAuAAACUCcAGGCdT*dT  |

---

|            |            |                          |
|------------|------------|--------------------------|
| si-Pcsk9-B | Sense:     | AGGuGuAucuccuAGAcAcdT*dT |
|            | Antisense: | GUGUCuAGGAGAuAcACCUdT*dT |

---

|        |            |                          |
|--------|------------|--------------------------|
| si-Con | Sense:     | cuuAcGcuGAGuAcuucGAdT*dT |
|        | Antisense: | UCGAAGuACUcAGCGuAAGdT*dT |

---

Lower case letters indicate bases with 2'-OMe modifications. All sequences end with a phosphorothioate linkage (dT\*dT). Mouse *Pcsk9* GeneBank accession: NM\_153565; human *PCSK9* GeneBank accession: NM\_174936.

**Supplementary Table S3. Sequences of primers for RT-qPCR**

| <b>Target</b> | <b>Forward Sequence (5'-3')</b> | <b>Reverse Sequence (5'-3')</b> | <b>Size (bp)</b> |
|---------------|---------------------------------|---------------------------------|------------------|
| mouse Pcsk9   | TTGCAGCAGCTGGGAACTT             | CCGACTGTGATGACCTCTGGA           | 76               |
| human PCSK9   | AGGGGAGGACATCATTGGTG            | CAGGTTGGGGGTCAGTACC             | 229              |
| IL6           | CAAAGCCAGAGTCCTTCAGAGAG         | CCTTAGCCACTCCTTCTGTGAC          | 90               |
| IL17A         | TTTTTCAGCAAGGAATGTGGA           | TTCATTGTGGAGGGCAGAC             | 60               |
| IL17F         | CAAGAAATCCTGGTCCTTCG            | GAGCATCTTCTCCAACCTGAA           | 69               |
| IL22          | TTTCCTGACCAAACCTCAGCA           | CTGGATGTTCTGGTCGTCAC            | 67               |
| IL23          | CACCTCCCTACTAGGACTCAGC          | TGGGCATCTGTTGGGTCT              | 71               |
| NFKB p50      | AGGAAGAAAATGGCGGAGTT            | GCATAAGCTTCTGGCGTTTC            | 243              |
| NFKB p65      | CTTGGCAACAGCACAGACC             | GAGAAGTCCATGTCCGCAAT            | 266              |
| Reg3r         | CCTGTCCTCCATGATCAAAAGCAG        | CATCCACCTCTGTTGGGTTC            | 99               |
| Fgf2          | GGCTGCTGGCTTCTAAGTGT            | GTCCCGTTTTGGATCCGAGT            | 153              |
| Hgf           | TGATTCTTTCAGCCCGGCAT            | TGTCCTTCTGCATAGGGGATG           | 154              |
| Igf1          | GAAGTCCCCGTCCCTATCGA            | CCTTCTCCTTTGCAGCTTCG            | 52               |
| Tgf-beta1     | AGCTGCGCTTGCAGAGATTA            | AGCCCTGTATTCCGTCTCCT            | 189              |
| Vegf          | CGGGCCTCGGTTCCAG                | CTGGGACCACTTGGCATGG             | 195              |

**Supplementary Table S4. Demographics and disease parameters of patients with psoriasis**

| Case | Sex | Age (years) | Nail involved | Family history | Length of disease (years) | PASI score |
|------|-----|-------------|---------------|----------------|---------------------------|------------|
| 1    | F   | 45          |               |                | 3                         | 46.2       |
| 2    | M   | 33          |               | +              | 5                         | 35.4       |
| 3    | F   | 50          |               |                | 10                        | 5.8        |
| 4    | M   | 41          | +             | +              | 10                        | 16.2       |
| 5    | F   | 22          |               |                | 1                         | 8.4        |
| 6    | M   | 33          |               |                | 3                         | 36.3       |
| 7    | M   | 35          | +             |                | 11                        | 9.4        |
| 8    | M   | 23          |               |                | 8                         | 14.8       |
| 9    | M   | 26          |               |                | 1                         | 20.2       |
| 10   | M   | 52          |               |                | 2                         | 26.3       |

**Supplementary Table S5. Demographics and disease parameters of healthy control**

| Case | Sex | Age<br>(years) | Biopsy<br>Location |
|------|-----|----------------|--------------------|
| 1    | M   | 49             | Back               |
| 2    | F   | 22             | Back               |
| 3    | M   | 30             | Back               |
| 4    | M   | 41             | Back               |
| 5    | M   | 19             | Back               |
| 6    | F   | 33             | Back               |

**Supplementary Table S6. Data of cell cycle**

|     |          | Sub-G1 | G0/G1 | S     | G2    |
|-----|----------|--------|-------|-------|-------|
| 24h | si-con   | 0.9%   | 71.4% | 6.4%  | 21.3% |
|     | si-con   | 0.6%   | 73.2% | 4.1%  | 22.2% |
|     | si-con   | 0.7%   | 70.9% | 4.9%  | 23.5% |
|     | si-PCSK9 | 10.2%  | 57.5% | 8.5%  | 23.8% |
|     | si-PCSK9 | 10.8%  | 62.2% | 8.7%  | 18.3% |
|     | si-PCSK9 | 10.8%  | 57.6% | 9.3%  | 22.2% |
| 48h | si-con   | 0.5%   | 64.8% | 8.6%  | 26.0% |
|     | si-con   | 1.6%   | 70.0% | 5.2%  | 23.2% |
|     | si-con   | 0.6%   | 74.7% | 5.9%  | 18.8% |
|     | si-PCSK9 | 13.0%  | 42.6% | 9.9%  | 34.5% |
|     | si-PCSK9 | 6.1%   | 59.6% | 7.8%  | 26.4% |
|     | si-PCSK9 | 6.5%   | 57.2% | 8.1%  | 28.2% |
| 72h | si-con   | 2.1%   | 65.5% | 7.8%  | 24.6% |
|     | si-con   | 1.3%   | 67.6% | 6.5%  | 24.7% |
|     | si-con   | 1.1%   | 65.4% | 6.5%  | 27.1% |
|     | si-PCSK9 | 15.7%  | 57.9% | 9.6%  | 16.8% |
|     | si-PCSK9 | 12.1%  | 51.4% | 12.5% | 24.1% |
|     | si-PCSK9 | 12.8%  | 50.8% | 11.8% | 24.6% |

**Supplementary Table S7. Annexin V+ apoptosis portions of si-Con and si-PCSK9 groups**

|          | 24h  | 48h  | 72h  |
|----------|------|------|------|
| si-Con   | 2.6  | 2.1  | 1.3  |
| si-Con   | 1.7  | 3.3  | 1.4  |
| si-Con   | 1.3  | 5.5  | 2    |
| si-PCSK9 | 11.8 | 14.4 | 38.4 |
| si-PCSK9 | 7.7  | 13.7 | 40.1 |
| si-PCSK9 | 12.1 | 12   | 26.8 |

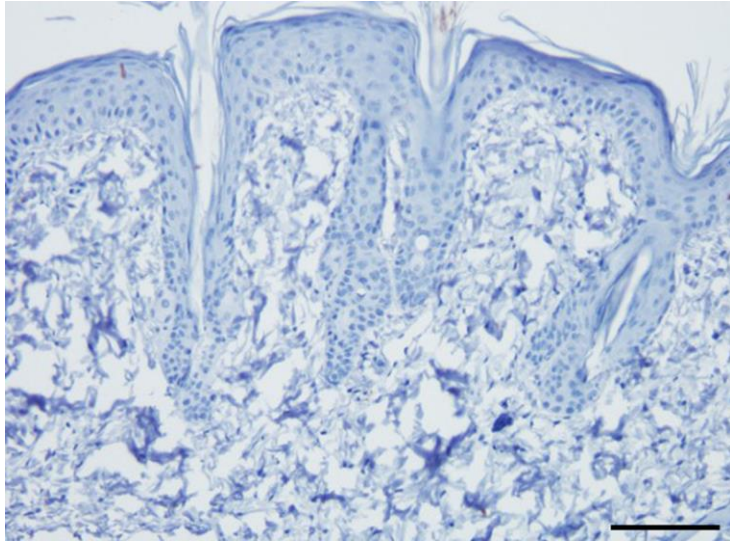

**Supplementary Figure S1. Rabbit IgG shows negative control.** All the antibodies used for IHC study were raised in rabbit (rabbit anti-mouse). To exclude false negative, rabbit IgG was used as a negative control in all the IHC assay. No false positive staining was observed. Scale bar = 100 $\mu$ m.



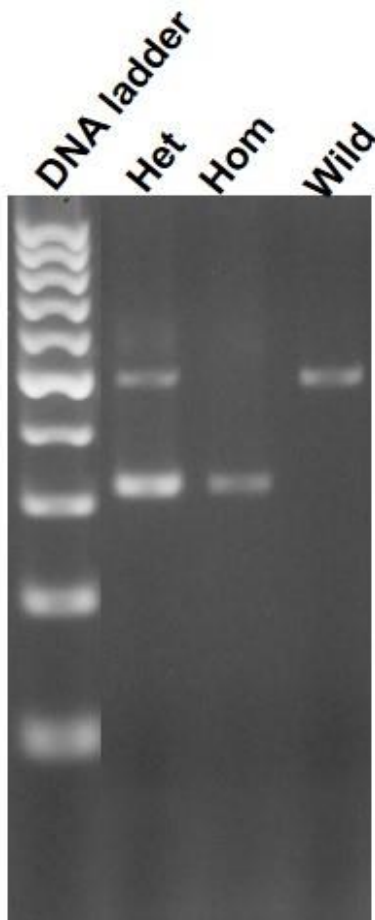

**Supplementary Figure S2. Genotyping result of Pcsk9 knockout mice.** Typical gel picture shows the genotype results of wild type, homozygous and heterozygous of Pcsk9 knockout mice.

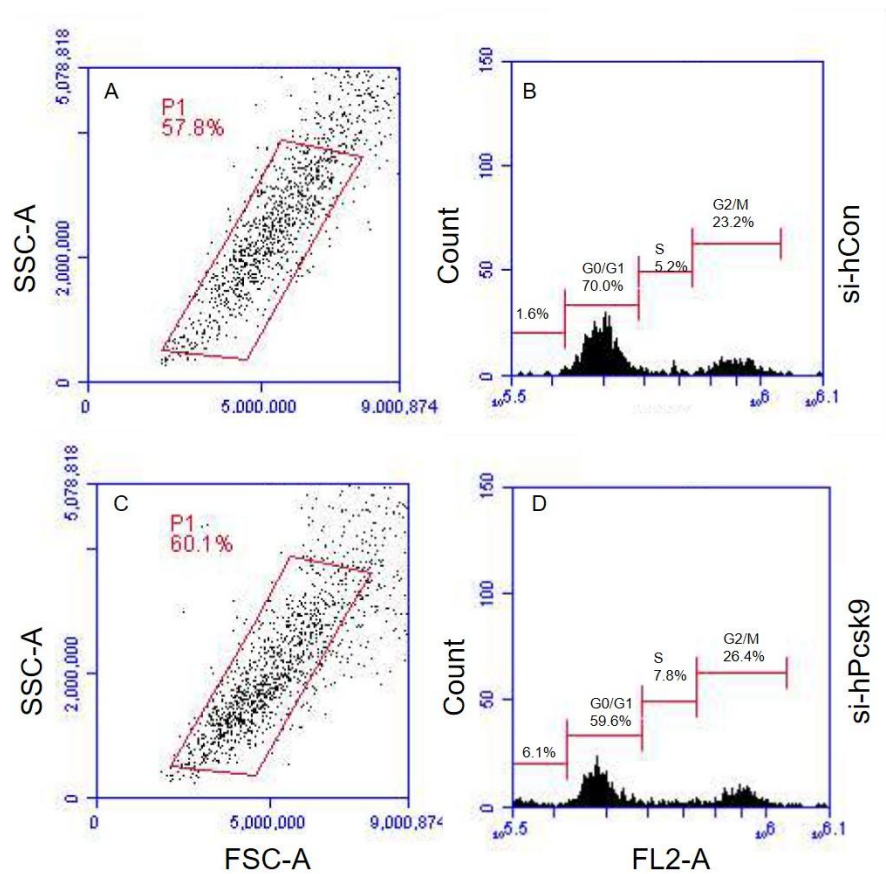

**Supplementary Figure S3. Suppressing Pcsk9 alters the cell cycle (48 h).** After being treated for 24, 48 and 72 hours, PI staining and flowcytometry assay was performed to detect the effects of suppressing PCSK9 on the cell cycle. Typical photo shows the cell cycle at 48 hours.

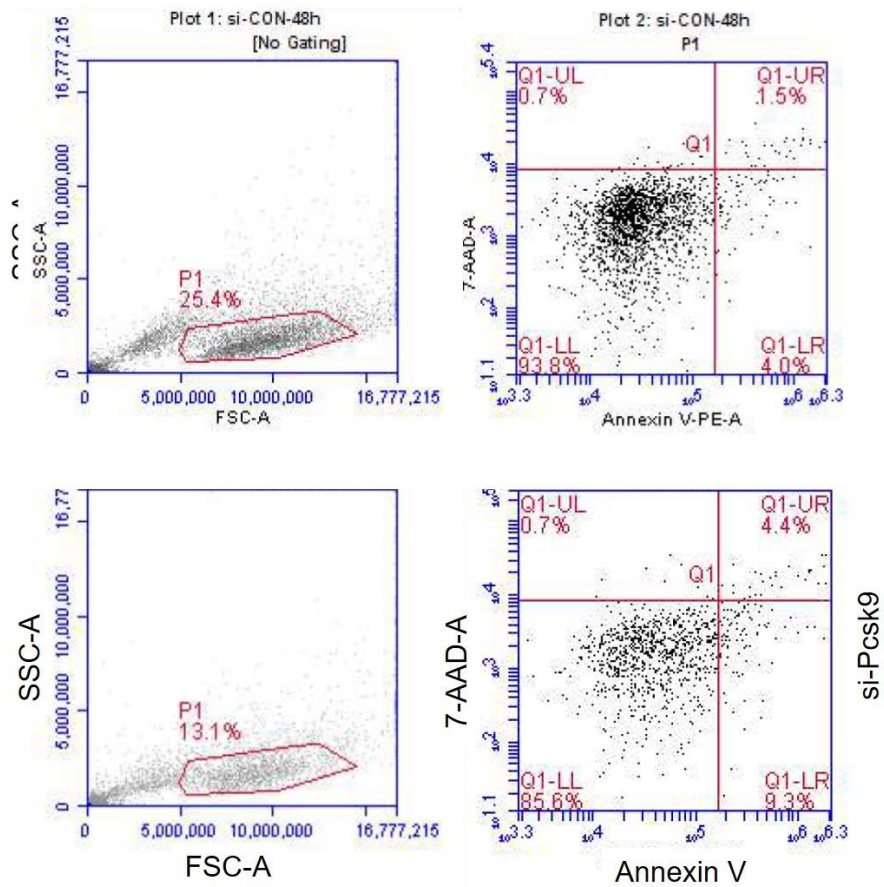

**Supplementary Figure S4. Suppressing Pcsk9 induces apoptosis (48h).** To verify the effects of suppressing PCSK9 on apoptosis, annexin-v and 7-AAD-A assay was conducted. Typical photo shows the apoptosis at 48 hours after the treatment.

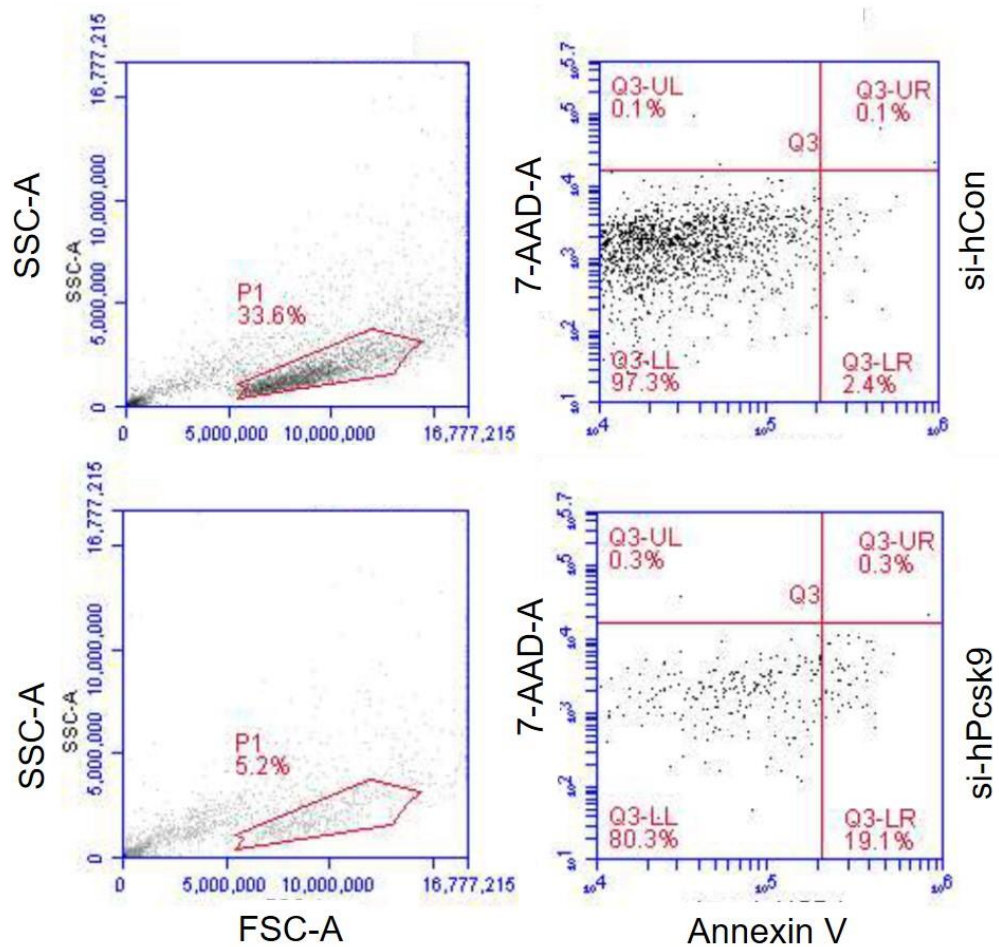

**Supplementary Figure S5. Suppressing Pcsk9 enhances UVB induced apoptosis (50 mJ/cm<sup>2</sup>).** Typical photo shows the the combined effect of UVB (100mJ/cm<sup>2</sup>) and si-Pcsk9 treatment on inducing the apoptosis of human keratinocytes, tested by Annexin-v and 7-AAD-A assay.
